# Supplementary material for: A Valid Bisphosphonate Modified Calcium Phosphate-Based Gene Delivery System: Increased Stability and Enhanced Transfection Efficiency In Vitro and In Vivo
Source: MDPI journal article supplement (doi:10.3390/pharmaceutics11090468), 2019-09-11
Supplement: s1 [file s1]

# Supplementary Materials: A valid Bisphosphonate Modified Calcium Phosphate-Based Gene Delivery System: Increased Stability and Enhanced Transfection Efficiency In Vitro and In Vivo

Ming Zhao, Ji Li, Dawei Chen and Haiyang Hu

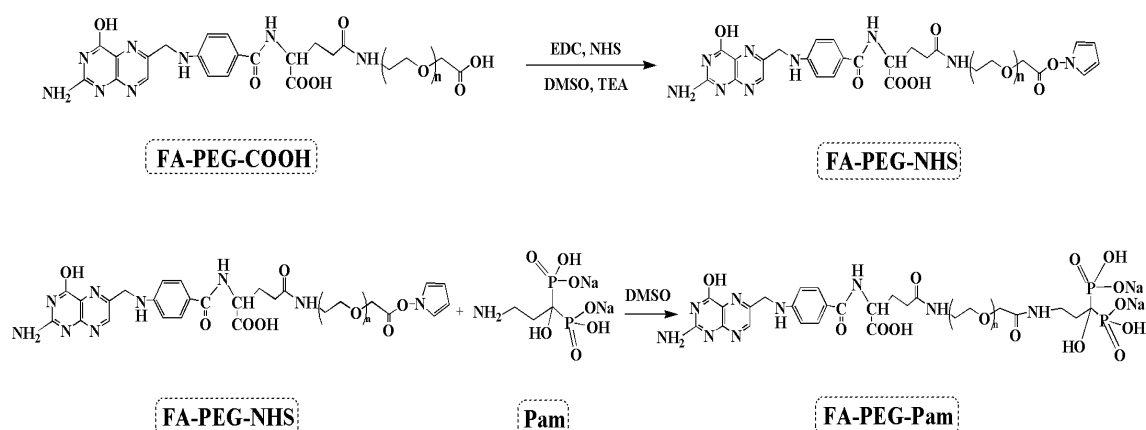

Figure S1. The synthesis procedures of FA-PEG-Pam.

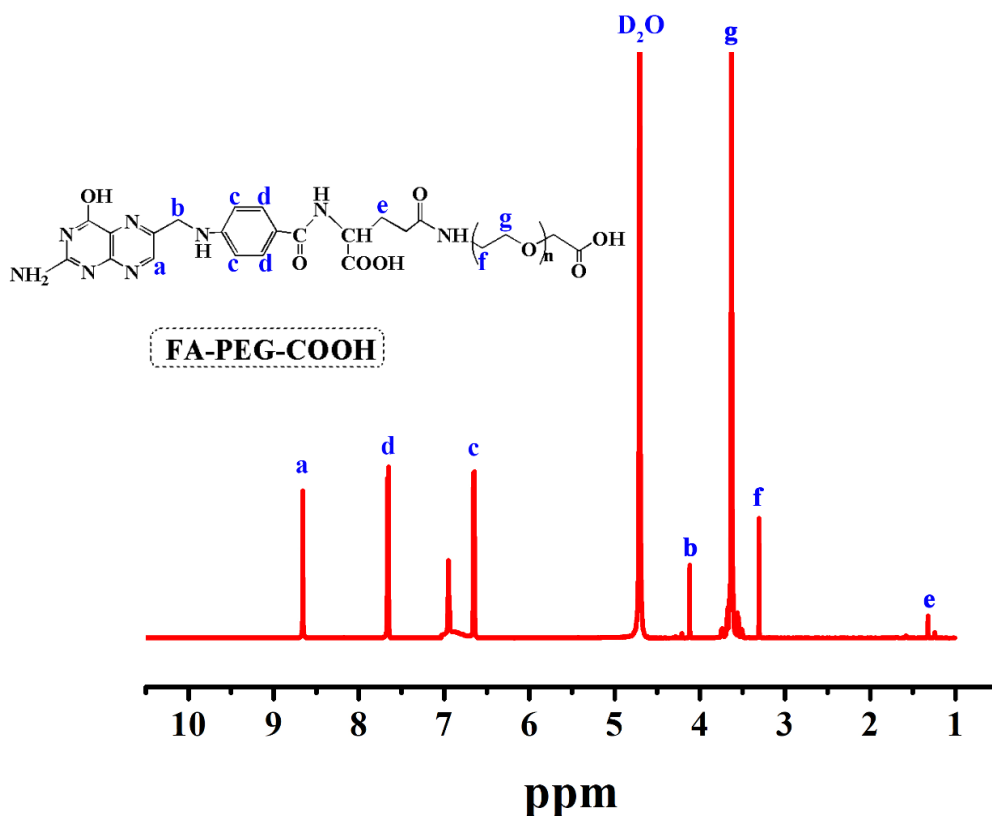

Figure S2. The <sup>1</sup>H NMR spectrum of FA-PEG-COOH.

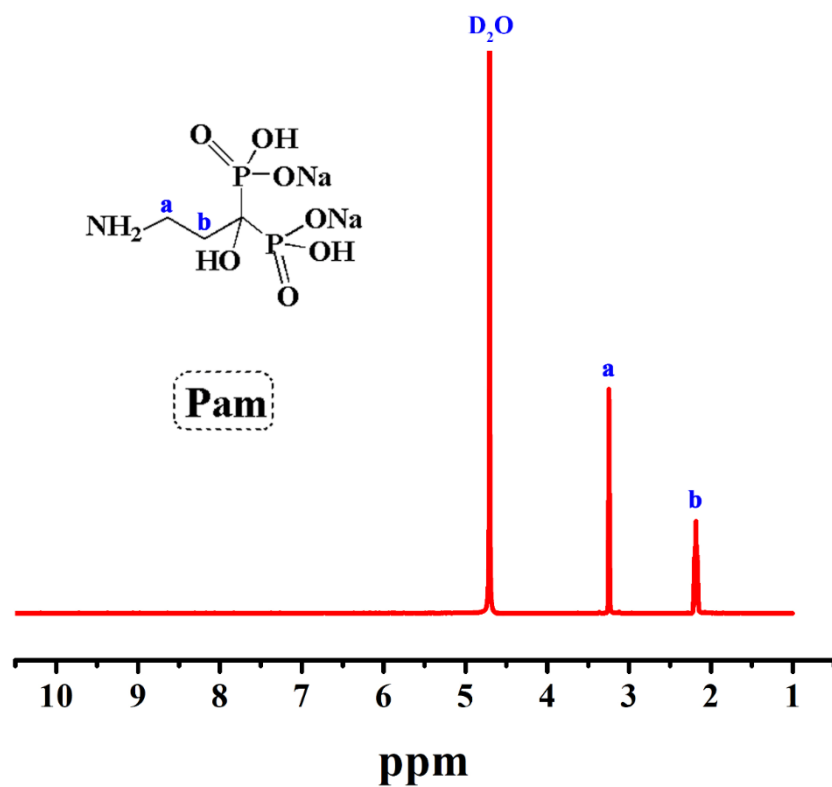

Figure S3. The <sup>1</sup>H NMR spectrum of Pam.

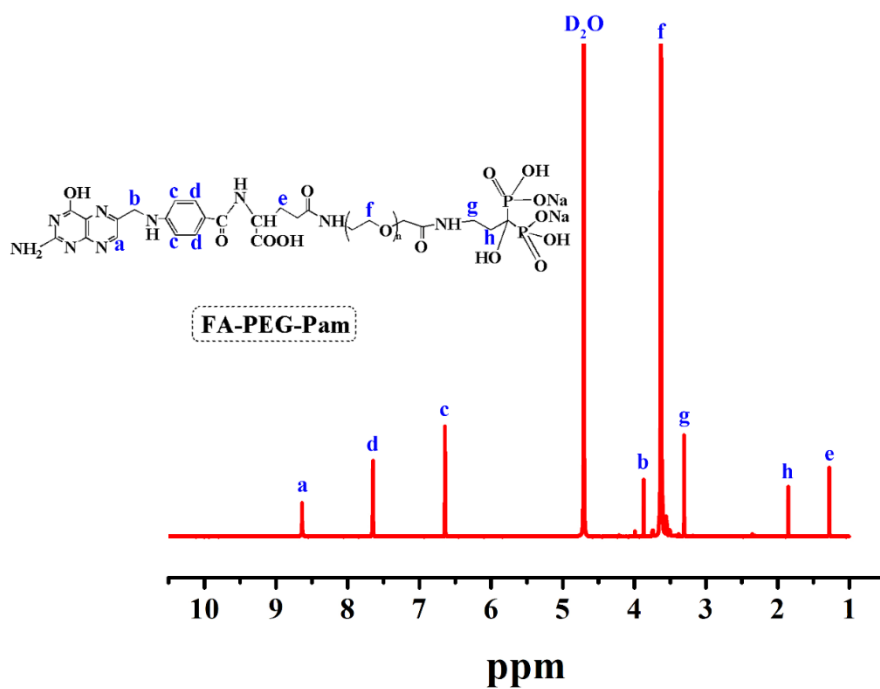

Figure S4. The <sup>1</sup>H NMR spectrum of FA-PEG-Pam.

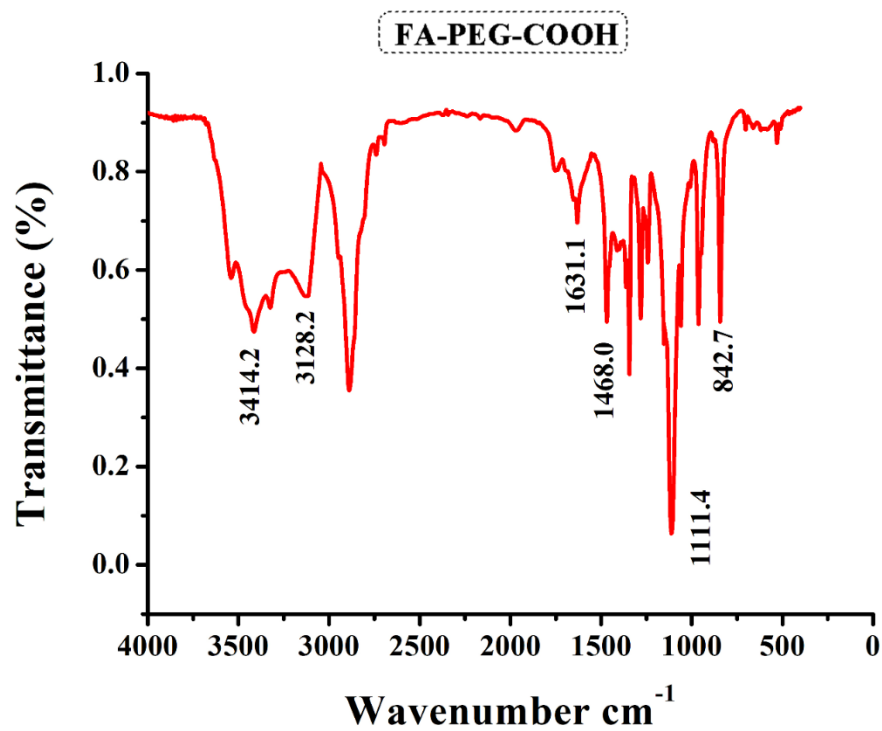

Figure S5. The FTIR spectrum of FA-PEC-COOH.

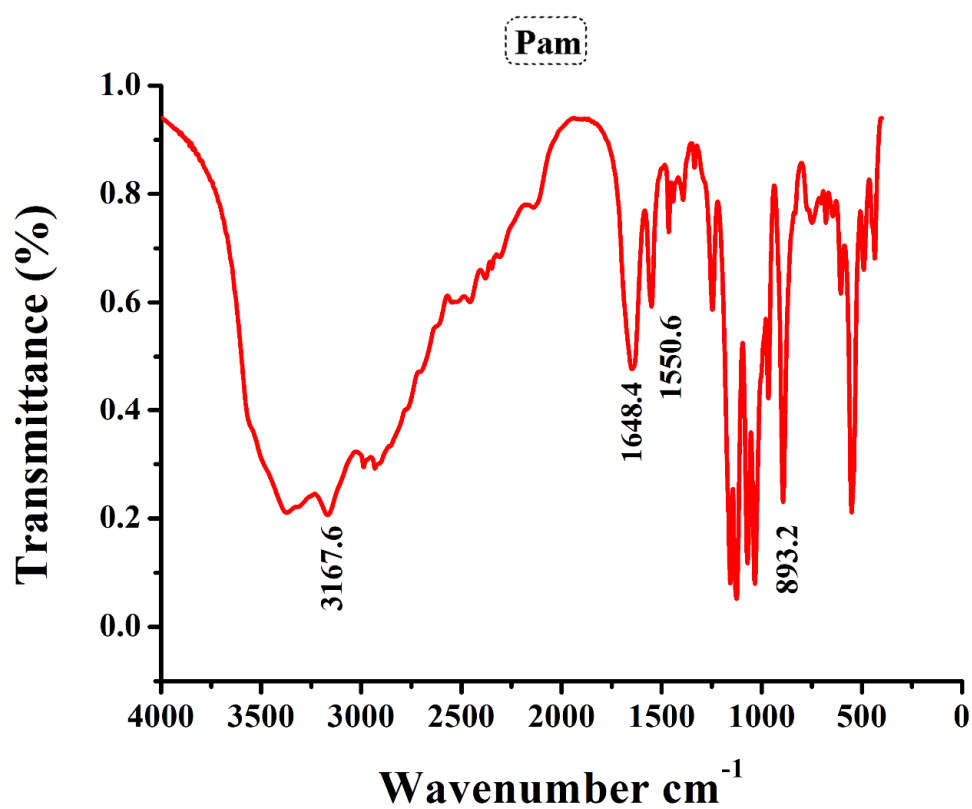

Figure S6. The FTIR spectrum of Pam.

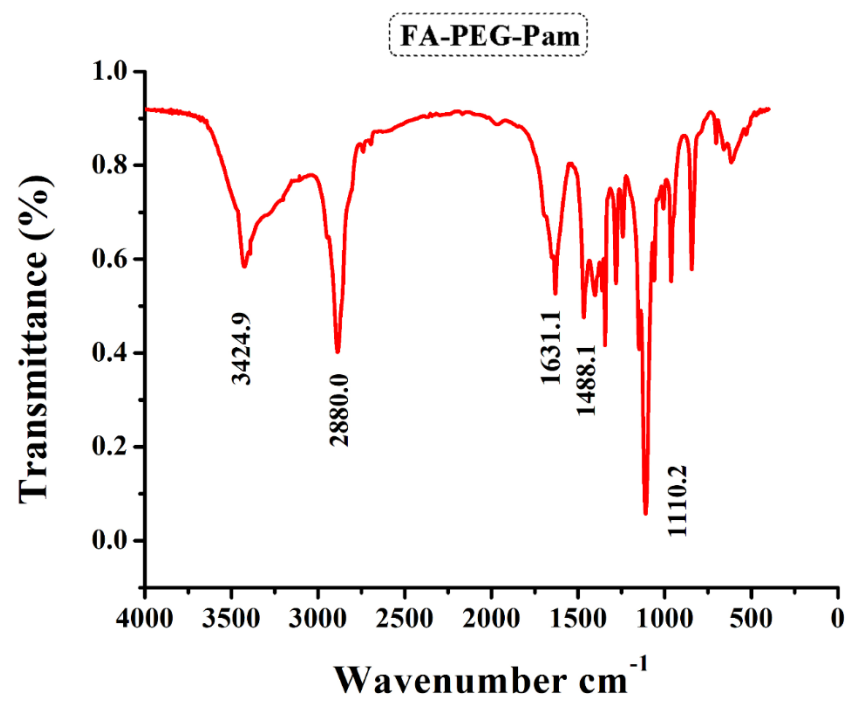

Figure S7. The FTIR spectrum of FA-PEG-Pam.
